# Supplementary material for: High-performance blue and green electrophosphorescence achieved by using carbazole-containing bipolar tetraarylsilanes as host materials
Source: Royal Society of Chemistry journal article supplement (doi:10.1039/c1jm11208b), 2011-01-01
Supplement: c1jm11208b.pdf [file c1jm11208b.pdf]

# Electronic Supporting Information (ESI)

## High-performance blue and green electrophosphorescences achieved by using carbazole-containing bipolar tetraarylsilanes as host materials

Shaolong Gong,<sup>a</sup> Yonghua Chen,<sup>b</sup> Xin Zhang,<sup>a</sup> Peijun Cai,<sup>a</sup> Cheng Zhong,<sup>a</sup> Dongge Ma,<sup>\*b</sup> Jingui Qin<sup>a</sup> and Chuluo Yang<sup>\*a</sup>

<sup>a</sup> Department of Chemistry, Hubei Key Lab on Organic and Polymeric Optoelectronic Materials, Wuhan University, Wuhan, 430072, People's Republic of China. Email: clyang@whu.edu.cn

<sup>b</sup> State Key Laboratory of Polymer Physics and Chemistry, Changchun Institute of Applied Chemistry, Chinese Academy of Sciences, Changchun, 130022, People's Republic of China. E-mail: mdg1014@ciac.jl.cn

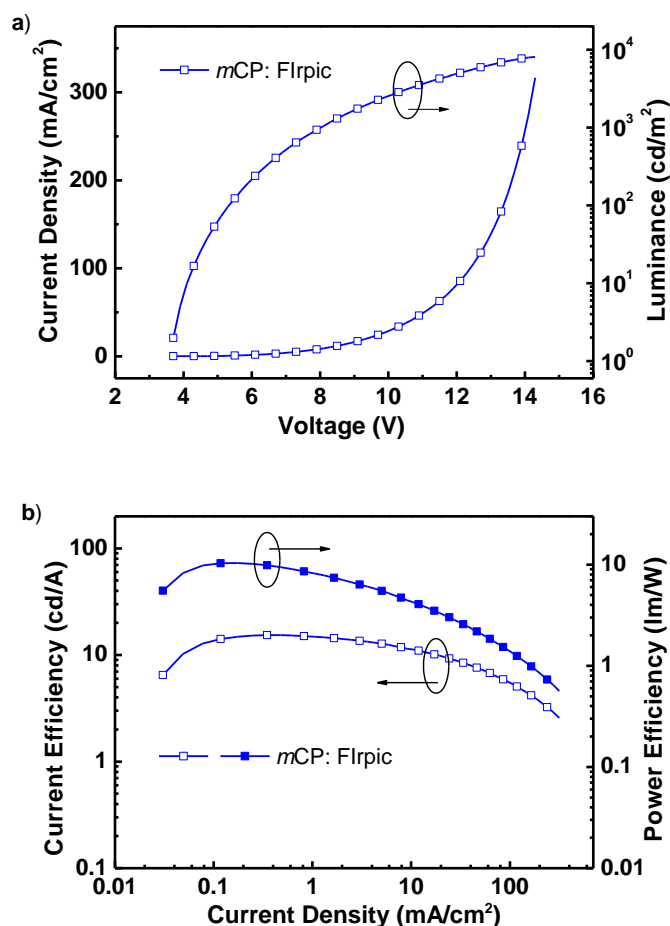

**Fig. S1** a) Current density-voltage-brightness characteristics and b) current efficiency and power efficiency versus current density curves for mCP-based blue device. The device configuration: ITO/MoO<sub>3</sub> (10 nm)/NPB (80 nm)/TCTA (5 nm)/mCP: Flrpic (8%, 20 nm)/TPBI (40 nm)/LiF (1 nm)/Al (100 nm).

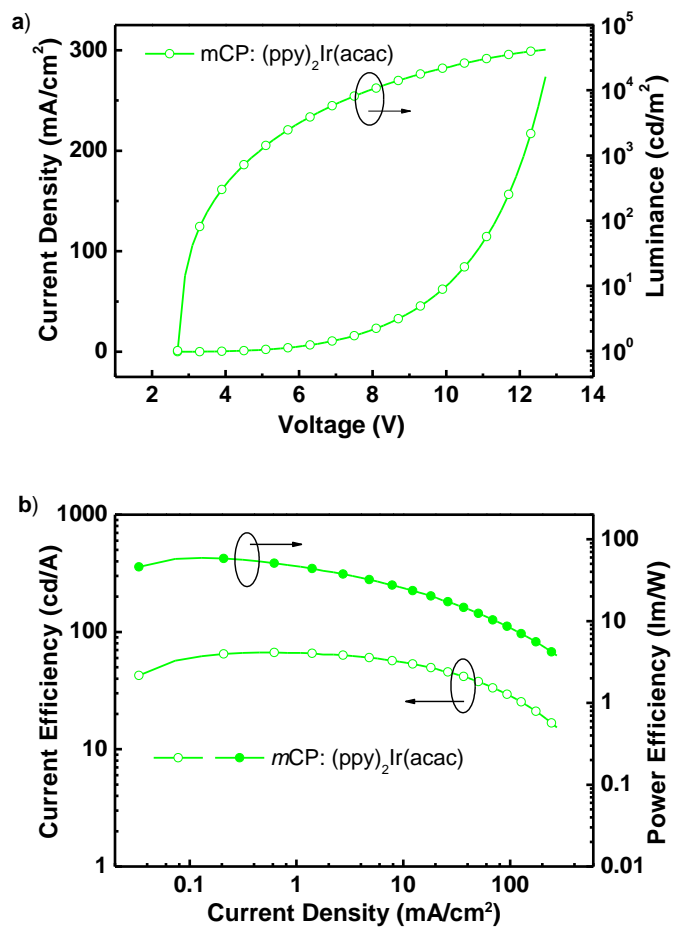

**Fig. S2** a) Current density-voltage-brightness characteristics and b) current efficiency and power efficiency versus current density curves for *m*CP-based green device. The device configuration: ITO/MoO<sub>3</sub> (10 nm)/NPB (80 nm)/TCTA (5 nm)/*m*CP: (ppy)<sub>2</sub>Ir(acac) (9%, 20 nm)/TPBI (40 nm)/LiF (1 nm)/Al (100 nm).
